# Supplementary material for: Bioinformatics applications on Apache Spark
Source: PubMed Central journal article supplement (PMC6113509; doi:10.1093/gigascience/giy098), 2018-08-07

# GigaScience

## Bioinformatics Application on Apache Spark

--Manuscript Draft--

|                                                      |                                                                                                                                                                                                                                                                                                                                                                                                                                                                                                                                                                                                                                                                                                                                                                                                                                                                                                                                                                                                                                                                                                                                                                                    |                          |
|------------------------------------------------------|------------------------------------------------------------------------------------------------------------------------------------------------------------------------------------------------------------------------------------------------------------------------------------------------------------------------------------------------------------------------------------------------------------------------------------------------------------------------------------------------------------------------------------------------------------------------------------------------------------------------------------------------------------------------------------------------------------------------------------------------------------------------------------------------------------------------------------------------------------------------------------------------------------------------------------------------------------------------------------------------------------------------------------------------------------------------------------------------------------------------------------------------------------------------------------|--------------------------|
| <b>Manuscript Number:</b>                            | GIGA-D-18-00131                                                                                                                                                                                                                                                                                                                                                                                                                                                                                                                                                                                                                                                                                                                                                                                                                                                                                                                                                                                                                                                                                                                                                                    |                          |
| <b>Full Title:</b>                                   | Bioinformatics Application on Apache Spark                                                                                                                                                                                                                                                                                                                                                                                                                                                                                                                                                                                                                                                                                                                                                                                                                                                                                                                                                                                                                                                                                                                                         |                          |
| <b>Article Type:</b>                                 | Review                                                                                                                                                                                                                                                                                                                                                                                                                                                                                                                                                                                                                                                                                                                                                                                                                                                                                                                                                                                                                                                                                                                                                                             |                          |
| <b>Funding Information:</b>                          | National Key R&D Program of China<br>(2017YFB0202600, 2016YFC1302500,<br>2016YFB0200400 and 2017YFB0202104)                                                                                                                                                                                                                                                                                                                                                                                                                                                                                                                                                                                                                                                                                                                                                                                                                                                                                                                                                                                                                                                                        | Professor shaoliang peng |
|                                                      | National Natural Science Foundation of China<br>(61772543, U1435222, 61625202,<br>61272056 and 61771331)                                                                                                                                                                                                                                                                                                                                                                                                                                                                                                                                                                                                                                                                                                                                                                                                                                                                                                                                                                                                                                                                           | Professor shaoliang peng |
|                                                      | Guangdong Provincial Department of Science and Technology<br>(2016B090918122)                                                                                                                                                                                                                                                                                                                                                                                                                                                                                                                                                                                                                                                                                                                                                                                                                                                                                                                                                                                                                                                                                                      | Professor shaoliang peng |
| <b>Abstract:</b>                                     | <p>With the rapid development of the next-generation sequencing (NGS), the ever-increasing genomic data poses a tremendous challenge to data processing. Therefore, there is an urgent need for highly scalable and powerful computational systems. Among the state-of-the-art parallel computing platforms, Apache Spark is a fast, general-purpose computing framework designed for large-scale data processing, which ensures high fault-tolerance and high scalability by introducing resilient distributed dataset (RDD) abstraction. Moreover, Spark can be up to 100x faster in memory access and 10x faster in disk access than Hadoop. In this paper, we surveyed Spark-based applications in the NGS and other biological domains, such as phylogeny, drug discovery and more. In the end, we discussed the challenges faced in this field and the future work on parallel computing of bioinformatics. We believe that this survey provides a comprehensive guideline for bioinformatics researchers to apply Spark in their own fields.</p> <p>Keywords: next-generation sequencing; bioinformatics; Apache Spark; resilient distributed dataset; memory computing</p> |                          |
| <b>Corresponding Author:</b>                         | runxin guo<br><br>CHINA                                                                                                                                                                                                                                                                                                                                                                                                                                                                                                                                                                                                                                                                                                                                                                                                                                                                                                                                                                                                                                                                                                                                                            |                          |
| <b>Corresponding Author Secondary Information:</b>   |                                                                                                                                                                                                                                                                                                                                                                                                                                                                                                                                                                                                                                                                                                                                                                                                                                                                                                                                                                                                                                                                                                                                                                                    |                          |
| <b>Corresponding Author's Institution:</b>           |                                                                                                                                                                                                                                                                                                                                                                                                                                                                                                                                                                                                                                                                                                                                                                                                                                                                                                                                                                                                                                                                                                                                                                                    |                          |
| <b>Corresponding Author's Secondary Institution:</b> |                                                                                                                                                                                                                                                                                                                                                                                                                                                                                                                                                                                                                                                                                                                                                                                                                                                                                                                                                                                                                                                                                                                                                                                    |                          |
| <b>First Author:</b>                                 | runxin guo                                                                                                                                                                                                                                                                                                                                                                                                                                                                                                                                                                                                                                                                                                                                                                                                                                                                                                                                                                                                                                                                                                                                                                         |                          |
| <b>First Author Secondary Information:</b>           |                                                                                                                                                                                                                                                                                                                                                                                                                                                                                                                                                                                                                                                                                                                                                                                                                                                                                                                                                                                                                                                                                                                                                                                    |                          |
| <b>Order of Authors:</b>                             | runxin guo                                                                                                                                                                                                                                                                                                                                                                                                                                                                                                                                                                                                                                                                                                                                                                                                                                                                                                                                                                                                                                                                                                                                                                         |                          |
|                                                      | yi zhao                                                                                                                                                                                                                                                                                                                                                                                                                                                                                                                                                                                                                                                                                                                                                                                                                                                                                                                                                                                                                                                                                                                                                                            |                          |
|                                                      | xiangke liao                                                                                                                                                                                                                                                                                                                                                                                                                                                                                                                                                                                                                                                                                                                                                                                                                                                                                                                                                                                                                                                                                                                                                                       |                          |
|                                                      | kenli li                                                                                                                                                                                                                                                                                                                                                                                                                                                                                                                                                                                                                                                                                                                                                                                                                                                                                                                                                                                                                                                                                                                                                                           |                          |
|                                                      | quan zou                                                                                                                                                                                                                                                                                                                                                                                                                                                                                                                                                                                                                                                                                                                                                                                                                                                                                                                                                                                                                                                                                                                                                                           |                          |
|                                                      | xiaodong fang                                                                                                                                                                                                                                                                                                                                                                                                                                                                                                                                                                                                                                                                                                                                                                                                                                                                                                                                                                                                                                                                                                                                                                      |                          |
|                                                      | shaoliang peng                                                                                                                                                                                                                                                                                                                                                                                                                                                                                                                                                                                                                                                                                                                                                                                                                                                                                                                                                                                                                                                                                                                                                                     |                          |
| <b>Order of Authors Secondary Information:</b>       |                                                                                                                                                                                                                                                                                                                                                                                                                                                                                                                                                                                                                                                                                                                                                                                                                                                                                                                                                                                                                                                                                                                                                                                    |                          |
| <b>Additional Information:</b>                       |                                                                                                                                                                                                                                                                                                                                                                                                                                                                                                                                                                                                                                                                                                                                                                                                                                                                                                                                                                                                                                                                                                                                                                                    |                          |

| Question                                                                                                                                                                                                                                                                                                                                                                                                                                                                                                                                                | Response   |
|---------------------------------------------------------------------------------------------------------------------------------------------------------------------------------------------------------------------------------------------------------------------------------------------------------------------------------------------------------------------------------------------------------------------------------------------------------------------------------------------------------------------------------------------------------|------------|
| <p>Are you submitting this manuscript to a special series or article collection?</p>                                                                                                                                                                                                                                                                                                                                                                                                                                                                    | <p>No</p>  |
| <p><b>Experimental design and statistics</b></p> <p>Full details of the experimental design and statistical methods used should be given in the Methods section, as detailed in our <a href="#">Minimum Standards Reporting Checklist</a>. Information essential to interpreting the data presented should be made available in the figure legends.</p> <p>Have you included all the information requested in your manuscript?</p>                                                                                                                      | <p>Yes</p> |
| <p><b>Resources</b></p> <p>A description of all resources used, including antibodies, cell lines, animals and software tools, with enough information to allow them to be uniquely identified, should be included in the Methods section. Authors are strongly encouraged to cite <a href="#">Research Resource Identifiers</a> (RRIDs) for antibodies, model organisms and tools, where possible.</p> <p>Have you included the information requested as detailed in our <a href="#">Minimum Standards Reporting Checklist</a>?</p>                     | <p>Yes</p> |
| <p><b>Availability of data and materials</b></p> <p>All datasets and code on which the conclusions of the paper rely must be either included in your submission or deposited in <a href="#">publicly available repositories</a> (where available and ethically appropriate), referencing such data using a unique identifier in the references and in the “Availability of Data and Materials” section of your manuscript.</p> <p>Have you have met the above requirement as detailed in our <a href="#">Minimum Standards Reporting Checklist</a>?</p> | <p>Yes</p> |

# Bioinformatics Application on Apache Spark

Runxin GUO<sup>1†</sup>, Yi ZHAO<sup>4†</sup>, Xiangke LIAO<sup>3</sup>, Kenli LI<sup>2</sup>, Quan ZOU<sup>5\*</sup>, Xiaodong FANG<sup>6\*</sup>,  
Shaoliang PENG<sup>2,3†\*</sup>

<sup>1</sup>College of Meteorology and Oceanology, National University of Defense Technology, Changsha 410073, China

<sup>2</sup>College of Computer Science and Electronic Engineering & National Supercomputer Centre in Changsha, Hunan University, Changsha 410082, China

<sup>3</sup>College of Computer, National University of Defense Technology, Changsha 410073, China

<sup>4</sup>Institute of Computing Technology, Chinese Academy of Sciences, Beijing 100190, China

<sup>5</sup>School of Computer Science and Technology, Tianjin University, Tianjin 300350, China

<sup>6</sup>BGI Genomics, BGI-Shenzhen, Shenzhen 518083, China

[pengshaoliang@nudt.edu.cn](mailto:pengshaoliang@nudt.edu.cn) ; [zouquan@nclab.net](mailto:zouquan@nclab.net) ; [fangxd@bgitechsolutions.com](mailto:fangxd@bgitechsolutions.com)

\*: corresponding author; †: equal contributors

## ABSTRACT

With the rapid development of the next-generation sequencing (NGS), the ever-increasing genomic data poses a tremendous challenge to data processing. Therefore, there is an urgent need for highly scalable and powerful computational systems. Among the state-of-the-art parallel computing platforms, Apache Spark is a fast, general-purpose computing framework designed for large-scale data processing, which ensures high fault-tolerance and high scalability by introducing resilient distributed dataset (RDD) abstraction. Moreover, Spark can be up to 100x faster in memory access and 10x faster in disk access than Hadoop. In this paper, we surveyed Spark-based applications in the NGS and other biological domains, such as phylogeny, drug discovery and more. In the end, we discussed the challenges faced in this field and the future work on parallel computing of bioinformatics. We believe that this survey provides a comprehensive guideline for bioinformatics researchers to apply Spark in their own fields.

**Keywords:** next-generation sequencing; bioinformatics; Apache Spark; resilient distributed dataset; memory computing

## INTRODUCTION

NGS has generated huge amounts of biological sequence data. To use these data efficiently, we need to store and analyze the data accurately and efficiently. However, the existing bioinformatics tools cannot effectively handle such a large amount of data. In order to solve the issues, MapReduce, a programming model for parallel computation of large datasets, has been proposed [1]. MapReduce splits large-scale datasets into many key-value pairs through both the map and reduce phases,

1 significantly improving performance and showing good scalability. Hadoop consists of two parts:  
2 the Hadoop Distributed File System (HDFS) and MapReduce, where HDFS is mainly used for  
3 distributed storage of massive datasets and MapReduce preforms distributed computing on these  
4 datasets. Hadoop is a software framework that enables distributed processing of large amounts data  
5 in a reliable, efficient, and scalable way. As a result, Hadoop has been adopted by the bioinformatics  
6 community in several areas [2], such as alignment [3], mapping [4] and sequence analysis [5].

7  
8  
9  
10  
11 However, as in [Figure 1](#), due to its disk-based I/O access pattern, intermediate calculation results  
12 are also stored in HDFS. Therefore, Hadoop is only suitable for batch data processing, not enough  
13 for interactive and real-time data processing, and shows poor performance for iterative data  
14 processing. To resolve this problem, Apache Spark [6] has been proposed, which is a fast general-  
15 purpose computational framework designed specifically to handle huge amounts of data. Unlike  
16 Hadoop's disk-based computing, Spark performs memory computing by introducing resilient  
17 distributed dataset (RDD). RDD is a read-only and fault-tolerant data structure. These useful  
18 differences make Spark even better for some workloads. In other words, in addition to providing  
19 interactive queries, Spark also supports in-memory distributed datasets and optimizes iterative  
20 workloads. Moreover, Spark can be up to 100x faster in memory access than Hadoop [6]. Even if  
21 we compare between them based on the performance of the disk, the gap is more than 10 times [7].

## 22 **THE SPARK FRAMEWORK**

23  
24  
25  
26  
27  
28  
29  
30  
31  
32  
33 Spark is an open source cluster computing environment similar to Hadoop, developed by UC  
34 Berkeley AMP lab. As in [Figure 2](#), Spark architecture consists of three main components: (a) the  
35 driver program, used to deploy the Spark operating environment and launch computation; (b) the  
36 cluster manager, responsible for obtaining and allocating the computing resources; (c) the worker  
37 nodes, in charge of performing real computations. It is implemented in the Scala language and uses  
38 Scala as its application framework. Unlike Hadoop, Spark and Scala are tightly integrated, with  
39 Scala operating distributed datasets just as easily as local collection objects. Moreover, Spark has  
40 the benefits of Hadoop MapReduce, but unlike Hadoop MapReduce, intermediate calculation  
41 results can be stored in memory, eliminating the need to read and write HDFS. So, Spark is better  
42 suited for iterative algorithms such as data mining and machine learning. Besides, Spark adopts  
43 directed acyclic graph (DAG) to optimize the execution process.

44  
45  
46  
47  
48  
49  
50  
51  
52  
53  
54 Spark implements in-memory operations based on the RDD abstraction. RDD is a read-only  
55 collection of objects partitioned on different nodes in a cluster so that the data in the RDD can be  
56 processed in parallel. The most important feature of RDD is that it provides fault tolerance and can  
57 automatically recover from a node failure. That is, if an RDD partition on a node is lost because of  
58  
59  
60  
61  
62  
63  
64  
65

1 a node failure, the RDD automatically recalculates the partition from its own data source. All this  
2 is transparent to the user. In addition, RDD data is stored in memory by default, but Spark  
3 automatically writes RDD data to disk if memory resources are low. Spark provides two types of  
4 operations on RDDs: transformations and actions. The former defines a new RDD, the latter returns  
5 a result or writes RDD data to the storage system. [Table 1](#) lists the commonly-used transformations  
6 and actions supported by Spark. Transformations employ lazy operations [8], which means that the  
7 operation of generating another RDD from one RDD transformation is not executed immediately,  
8 and the calculation process is not actually started until an action is performed. [Figure 3](#) shows  
9 Spark's task processing flow chart.

10 Besides, as in [Figure 4](#), the Spark ecosystem, the BDAS (Berkeley Data Analysis Stack), includes  
11 components such as Spark SQL, Spark Streaming, MLlib, and GraphX. These components provide  
12 the real-time processing applications for Spark Streaming, the ad hoc query for Spark SQL, the  
13 machine learning for MLlib, and the GraphX graph processing.

## 24 SPARK IN ALIGNMENT AND MAPPING

25 The rapid development of NGS technology has generated a large amount of sequence data (reads),  
26 which has a tremendous impact on sequence alignment and mapping process. Currently, the  
27 sequence alignment and mapping process still consume a lot of time.

28 The Smith-Waterman (SW) algorithm [9], which produces the optimal local alignment between two  
29 strings of nucleic acid sequences or protein sequences, is widely used in bioinformatics. However,  
30 SW algorithm requires a high computational cost due to high computational complexity. To speed  
31 up the algorithm, in 2015, Zhao G *et al* implemented the SW algorithm on Spark for the first time,  
32 called as SparkSW [10]. It consisted of three phases: data preprocessing, SW as map tasks and top  
33 K records as reduce tasks. Experimental results [10] showed that SparkSW was load-balancing and  
34 scalable with computing resources increased.

35 However, SparkSW merely supports SW algorithm without the mapping location and traceback of  
36 optimal alignment, as a result, SparkSW executes slowly. Therefore, in 2017, Xu Bo *et al* proposed  
37 DSA [11], which employed Single Instruction Multiple Data (SIMD) instruction to parallel the  
38 sequence alignment algorithm at each worker node. Experimental results [11] showed that DSA  
39 achieved up to 201x speedup over SparkSW and almost linear speedup with the increase of cluster  
40 nodes.

41 Subsequently, Xu Bo *et al* proposed CloudSW [12], an efficient distributed SW algorithm which  
42 leveraged Spark and SIMD instructions to accelerate the algorithm and provided APIs service in  
43 the cloud. Experimental results [12] showed that CloudSW achieved up to 3.29x speedup over DSA

1 and 621x speedup over SparkSW. And CloudSW also showed excellent scalability and achieved up  
2 to 529 giga cell updates per second (GCUPS) in protein database search with 50 nodes in Aliyun.  
3 Burrows-Wheeler aligner (BWA) is composed of BWA-backtrack [13], BWA-SW [14] and BWA-  
4 MEM [15] for performing sequence alignment and mapping in bioinformatics. Before the advent of  
5 Spark-based BWA tool, there were several other BWA tools based on big data technology, including  
6 BigBWA [16], Halvade [17] and SEAL [18]. However, they were based on Hadoop showing limited  
7 scalability and complex implementation.

8  
9  
10  
11  
12  
13 As a result, in 2015, Al-Ars Zaid *et al* [19] implemented three different versions of BWA-MEM  
14 and compared their performance: a native cluster-based version, a Hadoop version and a Spark  
15 version. Three implementations were evaluated on the same IBM Power7 and Intel Xeon servers  
16 with the WordCount example. Results [19] showed that simultaneous multithreading improved the  
17 performance of three versions of BWA-MEM, and the Spark version with 80 threads increased  
18 performance by up to 87% than the native cluster version using 16 threads. Furthermore, the Hadoop  
19 version with 4 threads increased performance by 17% and the Spark version with more threads  
20 increased performance by 27%.

21  
22  
23  
24  
25  
26  
27  
28 After then, in 2016, Abuín JM *et al* proposed SparkBWA [20] which is composed of three main  
29 phases: the RDDs creation phase, the map phase, and the reduce phase. Experimental results [20]  
30 showed that for the BWA-backtrack algorithm, SparkBWA achieved the average speedup of 1.9x  
31 and 1.4x compared with SEAL and pBWA respectively. For the BWA-MEM algorithm, SparkBWA  
32 was 1.4x faster than BigBWA and Halvade tools on average.

33  
34  
35  
36  
37  
38 However, SparkBWA required the data availability in the HDFS. In general, the input files were  
39 given in gzip format, which required first uncompressing the file before uploading it to the HDFS.  
40 Subsequently, this also slowed down the execution of BWA itself, since data on the HDFS had to  
41 be reformatted as appropriate input to the BWA program tasks running on the cluster. Finally, the  
42 output files produced by those BWA tasks required significant time to combine separately at the  
43 end.

44  
45  
46  
47  
48  
49 Therefore, in 2017, Alars HMA *et al* employed Spark to propose StreamBWA [21], where the input  
50 data was being streamed directly from a compressed file. This file could either be located on the  
51 master node or on a URL, which eliminated the cost of execution time of downloading the file and  
52 then uncompressing it. Moreover, since the master node could stream data to the data nodes, the  
53 overhead of uploading data to the HDFS could also be hidden. The master node could also start  
54 combining the output files of BWA tasks running on the data nodes, in parallel, once they were  
55 available, further reducing the overall time. Experimental results [21] showed that this streaming  
56  
57  
58  
59  
60  
61  
62  
63  
64  
65

1 distributed approach was approximately 2x faster than the non-streaming approach. Furthermore,  
2 StreamBWA was 5x faster than SparkBWA.  
3

4 Multiple sequence alignment (MSA) refers to the sequence alignment of three or more biological  
5 sequences, such as protein or nucleic acid sequences. One of representative tools for performing  
6 MSA is PASTA [22]. PASTA is a derivative of SATé [23], which produces highly accurate  
7 alignments in shared memory computers. However, PASTA is limited to processing small and  
8 medium datasets, because the computing power of shared memory systems cannot meet the memory  
9 and time requirements of large-scale datasets.  
10

11 Therefore, in 2017, Abuín J M *et al* proposed PASTASpark [24], which allowed executions on a  
12 distributed memory cluster taking advantage of Spark. It employed an in-memory RDD of key-  
13 value pairs to parallel the calculating MSAs phase. Experiments were conducted on two different  
14 clusters (CESGA and AWS). The results [24] showed that PASTASpark achieved up to 10x  
15 speedups compared with single-threaded PASTA and was able to process 200,000 sequences in 24  
16 hours using only AWS nodes. Therefore, PASTASpark ensured scalability and fault tolerance which  
17 greatly reduced the time to obtain MSA.  
18

19 The probabilistic pairwise model [25] is widely used in all consistency-based MSA tools, such as  
20 MAFFT [26], ProbCons [27] and T-Coffee(TC) [28]. However, the global distributed memory  
21 cannot meet the ever-increasing sequence datasets, which causes the need of specialized distributed  
22 databases, such as HBase or Cassandra. As a result, in 2017, Lladós Jordi *et al* employed Spark to  
23 propose a new tool, PPCAS [29], which could parallel the probabilistic pairwise model for large-  
24 scale protein sequences and store it in a distributed platform. Experimental results [29] showed that  
25 it was better with single node and provided almost linear speedup with the increase in the number  
26 of nodes. In addition, it could compute more sequences using the same memory.  
27

28 NCBI BLAST [30, 31] is widely used to implement algorithms for sequence comparison. Before  
29 the Spark-based BLAST was created, several other BLAST tools had been proposed including  
30 mpiBLAST [32], GPU-BLAST [33] and CloudBLAST [34]. However, with the increasing number  
31 of genomic data, these tools showed limited scalability and efficiency.  
32

33 As a result, in 2017, Castro MRD *et al* proposed SparkBLAST [35], which utilized cloud computing  
34 and Spark framework to parallel BLAST. In SparkBLAST, Spark's *pipe* operator and RDDs were  
35 utilized to call BLAST as an external library and perform scalable sequence alignment. It was  
36 compared with CloudBLAST on both Google and Microsoft Azure Clouds. Experimental results  
37 [35] showed that SparkBLAST outperformed CloudBLAST in terms of speedup, scalability and  
38 efficiency.  
39  
40  
41  
42  
43  
44  
45  
46  
47  
48  
49  
50  
51  
52  
53  
54  
55  
56  
57  
58  
59  
60  
61  
62  
63  
64  
65

1 Metagenomics is crucial for studying genetic material directly from environmental samples.  
2 Fragment recruitment is the process of aligning reads to reference genomes in metagenomics data  
3 analysis. And in 2017, Zhou W *et al* proposed MetaSpark [36], which employed Spark to recruit  
4 metagenomics reads to reference genomes.  
5

6  
7 MetaSpark utilized the RDD of Spark to cache datasets in memory and scaled well along dataset  
8 size increments. It consisted of five steps including constructing k-mer RefindexRDD, constructing  
9 k-mer ReadlistRDD, seeding, filtering, and banded alignment. It was evaluated on a ten-node cluster  
10 working under the Spark standalone module where each node contained an 8-core CPU and 16 GB  
11 RAM. It employed about one million 75bp Illumina reads dataset and two references (the 194  
12 human gut genomes and the bacterial genomes) that were respectively 0.616GB and 1.3GB in size.  
13 Experimental results [36] showed that MetaSpark recruited more reads than FR-HIT [37] with the  
14 same parameters and 1 million reads. MetaSpark recruited 501,856 reads when there were 0.616  
15 GB human gut genome references, while FR-HIT recruited 489,638 reads. MetaSpark increased  
16 recruited reads by 2.5%. When references changed to a 1.3 GB bacterial genome, MetaSpark  
17 recruited 463,862 reads, while FR-HIT recruited 444,671 reads. MetaSpark increased recruited  
18 reads by 4%. Moreover, the results also showed that MetaSpark offered good scalability. Under a  
19 0.616 GB reference, run time for 0.1 million reads was 51 min under 4 nodes, and decreased slightly  
20 to 23.5 min under 10 nodes. For the 1 million read datasets, MetaSpark would crash under 4 nodes  
21 due to limited memory. Under 6 nodes, it finished running after 312 min and would sharply decrease  
22 to 201 min under 10 nodes.  
23

## 24 **SPARK IN ASSEMBLY**

25 Due to short lengths of the NGS reads (<500 bp), they need to be assembled prior to further analysis,  
26 which is another important phase in sequence analysis workflow. In general, there are two types of  
27 assembly: the reference assembly and *de novo* assembly. The assembly algorithm includes two  
28 categories: overlap-layout-consensus (OLC) algorithm and the de Bruijn graph algorithm. The  
29 former is generally employed to assemble longer reads, while the latter shows a good performance  
30 in assembling short reads.  
31

32 Before Spark-based distributed memory *de novo* assemblers were created, although there were some  
33 MPI-based assemblers (such as Ray [38], AbySS [39] and SWAP-Assembler [40]), they showed  
34 limited scalability, accuracy, and computational efficiency. Therefore, in 2015, Abu-Doleh Anas *et*  
35 *al* proposed Spaler [41] taking advantage of Spark and GraphX API. It consisted of two main parts:  
36 (a) de Bruijn graph construction, and (b) Contigs generating. And it was evaluated with other MPI-  
37  
38  
39  
40  
41  
42  
43  
44  
45  
46  
47  
48  
49  
50  
51  
52  
53  
54  
55  
56  
57  
58  
59  
60  
61  
62  
63  
64  
65



1 based tools in terms of quality, execution time, and scalability. Experiments results [41] showed  
2 that Spaler had better scalability and it could achieve comparable or better assemble quality.

3  
4 And in 2016, X Pan *et al* [42] put forward a new assembling algorithm based on Spark which  
5 employed the method of matching K-2 bit to simplify the de Bruijn graph. This algorithm was  
6 evaluated using 6 groups of DNA in the NCBI. Experimental results [42] showed that this strategy  
7 not only solved the problem of low efficiency based on the MapReduce algorithm, but also  
8 optimized the algorithm itself. The combination of these two aspects were very suitable for the  
9 large-scale DNA sequence assembling. Besides, results also showed that the new sequence  
10 assembling algorithm based on Spark could ensure accuracy of assembling results.

11  
12 To address the problem of poor assembling precision and low efficiency, in 2017, Dong G *et al* [43]  
13 proposed SA-BR-Spark, a new sequence assembly algorithm based on Spark. The authors first  
14 designed a precise assembling algorithm under the strategy of finding the source of reads based on  
15 the MapReduce and Eulerian path algorithm (SA-BR-MR). SA-BR-MR calculated 54 sequences  
16 which were randomly selected from animals, plants and microorganisms with base lengths from  
17 hundreds to tens of thousands from NCBI. All matching rates of 54 sequences were 100%. For each  
18 species, the algorithm also summarized the range of K which made the matching rates to be 100%.  
19 In order to verify the range of K value of hepatitis C virus (HCV) and related variants, the randomly  
20 selected eight HCV variants were calculated. The results confirmed the correctness of K range of  
21 hepatitis C and related variants from NCBI. After that, SA-BR-Spark was put forward. Experimental  
22 results [43] showed that SA-BR-Spark provided a superior computational speed compared with SA-  
23 BR-MR.

24  
25 To resolve the large memory requirement problem of most OLC *de novo* assemblers, in 2017, Paul  
26 AJ *et al* [44] employed string graph reduction algorithms taking advantage of Spark. The proposed  
27 Spark algorithms were evaluated with a very large sample dataset. Results showed that this dataset  
28 was assembled by the proposed Spark algorithms using 15 virtual machines in 0.5 hours compared  
29 to the 7.5 hours of OLC based Omega [45] assembler.

## 30 **SPARK IN SEQUENCE ANALYSIS**

### 31 **Spark in variant analysis**

32  
33 The GATK (Genome Analysis Toolkit) DNA analysis pipeline is widely used in genomic data  
34 analysis. Before Spark-based GATK tools were created, while several other tools had been  
35 developed to address the issue of scalability in the pipeline (such as Halvade [17] and Churchill  
36 [46]), they showed limited scalability, accuracy and computational efficiency.

1 Therefore, in 2015, Mushtaq H *et al* [47] utilized Spark to propose a cluster-based GATK pipeline.  
2 To reduce the execution time, this approach kept data active in the memory between the map and  
3 reduce phases. By using runtime statistics of the active workload, it achieved a dynamic load  
4 balancing algorithm that could better utilize system performance. Experimental results [47] showed  
5 that this method achieved a 4.5x speedup compared to the multi-threaded GATK pipeline on a single  
6 node. Besides, when executed on a 4-node cluster, this approach was 63% faster than Halvade.  
7

8 After that, in 2016, Deng L *et al* proposed HiGene [48], which employed Spark to enable multi-  
9 core and multi-node parallelization of the GATK pipeline. HiGene put forward a dynamic  
10 computing resource scheduler and an efficient data skew mitigation method to improve performance.  
11 Experiments were conducted with the NA12878 whole human genome dataset. Results [48] showed  
12 that HiGene reduced the total running time from days to nearly an hour. Besides, compared with  
13 Halvade, HiGene was also 2x faster. Meanwhile, Li X *et al* employed Spark to propose GATK-  
14 Spark [49] to parallel the GATK pipeline by taking full account of compute, workload and I/O  
15 characteristics. And it was built on top of ADAM format [50]. Experimental results [49] showed  
16 that GATK-Spark shortened the total running time from 20 hours to 30 minutes on 256 CPU cores  
17 which achieved more than 37 times speedup.  
18

19 The advent of Spark provides the possibility of interactive processing for NGS data. And in 2014,  
20 Wiewiórka MS *et al* proposed SparkSeq [51] to build and run genomic analysis pipelines in an  
21 interactive way by using Spark. Experimental results showed that SparkSeq achieved 8.4–9.15 times  
22 speedup than SeqPig. Besides, it could accelerate data querying up to 110x and reduce memory  
23 consumption by 13x.  
24

### 25 **Spark in motif analysis**

26 Due to the nature of NGS technology, the generated data are usually accompanied by some noises  
27 or other types of errors which are known as uncertain data [52]. And among these uncertain data,  
28 there are some frequently recurring patterns called motifs [53]. Mining motifs from these uncertain  
29 data is an important problem but a computationally intensive task. Before Spark-based mining  
30 algorithm was created, while several mining algorithms had been developed (such as HPSPM [54],  
31 DGSP [55] and SPAMC [56]), they showed limited scalability. Therefore, Jiang F *et al* [57] utilized  
32 Spark to propose a scalable algorithm for mining sequence motifs. This algorithm took advantage  
33 of Spark's RDDs and DAG, and allowed users to specify the minimum and maximum length of  
34 motif. Experiments were conducted with human genome datasets and bacteria DNA sequence  
35 datasets and results [57] showed this approach could take a short period of time to extract accurate  
36 motifs.  
37  
38  
39  
40  
41  
42  
43  
44  
45  
46  
47  
48  
49  
50  
51  
52  
53  
54  
55  
56  
57  
58  
59  
60  
61  
62  
63  
64  
65

## SPARK IN OTHER BIOLOGICAL APPLICATIONS

### Spark in genomic inference

Efficient score statistic methods [58] are widely applied in high-throughput genomic data inference. A typical method of estimating the sampling distribution of the statistics is to employ asymptotic approximation, but it is inappropriate for small or uncommon variants. Although resampling methods [59] are appropriate for genomic inference, they greatly increase the computational burden of analysis. In order to tackle the computational challenge for resampling based inference, Bahmani Amir *et al* proposed SparkScore [60], a distributed genomic inference approach taking advantage of Spark. SparkScore leveraged the nature of asymptotic and resampling inference based on efficient score statistics for distributed genomic inference. Experiments on synthetic datasets using Amazon Elastic MapReduce (EMR) [60] demonstrated SparkScore's efficiency and scalability.

### Spark in epigenetics

CpG islands (CGI) are important epigenetic markers, which play an essential role in epigenetics [61]. However, it is very challenging to investigate the CpG islands and their structures. Before Spark-based applications were developed, while several methods had been proposed to determine the CPG island (such as bisulfite modification-based methods), they were time-consuming and too costly. Thus, Yu N *et al* [62] utilized Spark to propose a novel CpG box model and a Markov model to redefine and investigate the CpG island which could greatly accelerate the analytic process. Experiments were conducted with Human and mouse chromosome sequences, 24 chromosomes and 21 chromosomes. Results [62] showed this cloud-assisted method displayed considerable accuracy and faster processing power (6-7 times faster with 10 cores) compared with sequential processing.

### Spark in phylogeny

Phylogeny reconstruction plays an important role in molecular evolutionary studies but faces significant computational challenges. Before Spark-based tools were created, while several tools had been put forward for phylogeny reconstruction, they could not scale well with a significant increase in data sets. Therefore, in 2016, Xu X *et al* proposed CloudPhylo [63], a fast and scalable Phylogeny reconstruction tool making use of Spark. It evenly distributed the entire computational workload among the working nodes. Experiment was conducted with the 5220 bacteria whole genome DNA sequences. Results [63] showed that CloudPhylo took 24508 seconds with one worker node and it could scale well as worker nodes increased. Moreover, CloudPhylo performed better than several existing tools when using more worker nodes. Besides, CloudPhylo achieved higher speedup on a larger dataset of about 100GB generated by simulation.

### Spark in drug discovery

1 It is crucial to identify candidate molecules that affect disease-related proteins in drug discovery.  
2 Although the Chemogenomics project tries to identify candidate molecules using machine learning  
3 predictor programs [64-66], these programs spend a significant time and cannot be easily extended  
4 to multiple nodes. To migrate existing programs to multi-node clusters without changing the original  
5 programs, Harnie D *et al* proposed S-CHEMO [67] using Saprk. In S-CHEMO, the intermediate  
6 data would be consumed again immediately on nodes that generated the data, reducing time and  
7 network bandwidth consumption. Experiments [67] compared S-CHEMO with the original pipeline,  
8 which showed almost linear speedup up to 8 nodes. Besides, this implementation also allowed easier  
9 monitoring and checkpointing.

### 17 **Spark in Single-cell RNA sequencing**

18 Single-cell RNA sequencing (scRNA-seq) is crucial for understanding biological processes.  
19 Compared with standard bulk RNA-seq experiments, scRNA-seq experiments typically generate a  
20 greater number of cell profiles. Although there are already several RNA-seq processing pipelines  
21 (such as Halvade, SparkSeq and SparkBWA), they cannot process such a large number of profiles.  
22 Therefore, Falco [68] was created to process large-scale transcriptomic data in parallel by using  
23 Hadoop and Spark. Experiments were conducted with two public scRNA-seq datasets. Results [68]  
24 showed compared with a highly optimized single-node analysis, Falco was at least 2.6 times faster.  
25 Besides, as the number of computing nodes increased, running time decreased. Besides, it allowed  
26 users to employ the low-cost spot instances of AWS which reduced the cost of analysis by 65%.

### 36 **Spark in variant association and population genetics studies**

37 Effectively analyzing thousands of individuals and millions of variants is a computationally  
38 intensive problem. Traditional parallel strategies such as MPI/OpenMP show poor scalability.  
39 While Hadoop provides an efficient and scalable computing framework, it is heavily dependent on  
40 disk operations. Therefore, in 2015, O'Brien AR *et al* proposed VariantSpark [69] to parallel  
41 population-scale tasks based on Spark and associated machine learning library, MLlib. Experiments  
42 were conducted on 3000 individuals with 80 million variants, which showed that VariantSpark was  
43 80% faster than ADAM, Hadoop/Mahout implementation and ADMIXTURE [70]. Besides,  
44 compared with R and Python implementations it was more than 90 % faster. And in 2017, Di Z *et al*  
45 proposed SEQSpark [71] to perform rare variant association analysis by using Spark. It was  
46 evaluated with whole-genome and simulated exome sequence data. The former was completed in  
47 1.5 hours and the latter in 1.75 hours. Moreover, it was always faster than Variant Association Tools  
48 and PLINK/SEQ, and in some cases running time was reduced to one percent.

### 60 **Spark in other works**

1 Biological simulations and experiments produce a large number of numerical datasets, and in 2017  
2 Klein M *et al* proposed Biospark [72] to process these data. Biospark was based on Hadoop and  
3 Spark, consisting of a set of Java, C++ and Python libraries. Besides, it provided the abstractions  
4 for parallel analysis of standard data types, including multidimensional arrays and images. To help  
5 parallel analysis of some common datasets, it also provided APIs and file conversion tools,  
6 including Monte Carlo, molecular dynamics simulations and time-lapse microscopy.

7  
8  
9  
10  
11 [Table 2](#) summarizes bioinformatics tools and algorithms based on Apache Spark.

## 12 **CONCLUSION**

13  
14 In conclusion, the Apache Spark is very suitable for processing large-scale datasets, due to its high  
15 performance, scalability and fault tolerance. With the rapid development of NGS technology, a large  
16 number of bioinformatics data have been generated, which poses a great challenge to traditional  
17 bioinformatics tools. For this reason, we have summarized the relevant works about Spark in  
18 bioinformatics and made a guideline on this topic. First, we make a comparison between Spark and  
19 Hadoop, and then introduce the Spark architecture, programming model, and processing mechanism  
20 in detail. After that, we survey Spark-based applications in the NGS and other biological domains.  
21 A researcher who wants to get involved in this field can have a general understanding of Spark in  
22 bioinformatics through our survey. Currently, Spark has been widely used in the field of  
23 bioinformatics and shows good results. We believe that bioinformatics applications based on Spark  
24 will provide promising performance for biological researchers in the future.  
25  
26  
27  
28  
29  
30  
31  
32  
33  
34

### 35 **Key Points**

- 36 ● The Apache Spark not only gives researchers a possibility of achieving efficient, scalable  
37 and fault tolerant computing performance, but also supports various system workloads such  
38 as batch processing, iterative, interactive and flow calculations.
  - 39 ● We introduce the Apache Spark framework in detail, helping researchers to understand its  
40 architecture, programming model and processing mechanism.
  - 41 ● We present Spark-based applications that can be employed in bioinformatics and discuss  
42 the future of parallel computing in bioinformatics.
- 43  
44  
45  
46  
47  
48  
49  
50  
51  
52

## 53 **COMPETING INTERESTS**

54 The authors declare that they have no competing interests.

## 55 **FUNDING**

56 This work was supported by National Key R&D Program of China [grant numbers  
57 2017YFB0202600, 2016YFC1302500, 2016YFB0200400 and 2017YFB0202104]; National  
58  
59  
60  
61  
62  
63  
64  
65

1 Natural Science Foundation of China [grant numbers 61772543, U1435222, 61625202, 61272056  
2 and 61771331]; and Guangdong Provincial Department of Science and Technology [grant number  
3 2016B090918122].  
4

## 5 REFERENCES

- 6  
7 1. Dean J, Ghemawat S. **MapReduce: simplified data processing on large clusters.**  
8 *Communications of the ACM* 2008, **51**(1):107-113.  
9
- 10 2. Zou Q, Li X-B, Jiang W-R *et al.* **Survey of MapReduce frame operation in bioinformatics.**  
11 *Briefings in bioinformatics* 2013, **15**(4):637-647.  
12
- 13 3. Zou Q, Hu Q, Guo M *et al.* **HAlign: Fast multiple similar DNA/RNA sequence alignment**  
14 **based on the centre star strategy.** *Bioinformatics* 2015, **31**(15):2475-2481.  
15
- 16 4. Nguyen T, Shi W, Ruden D. **CloudAligner: A fast and full-featured MapReduce based tool**  
17 **for sequence mapping.** *BMC research notes* 2011, **4**(1):171.  
18
- 19 5. Nordberg H, Bhatia K, Wang K *et al.* **BioPig: a Hadoop-based analytic toolkit for large-scale**  
20 **sequence data.** *Bioinformatics* 2013, **29**(23):3014-3019.  
21
- 22 6. Zaharia M, Chowdhury M, Franklin MJ *et al.* **Spark: Cluster computing with working sets.**  
23 *HotCloud* 2010, **10**(10-10):95.  
24
- 25 7. Han Z, Zhang Y. **Spark: A Big Data Processing Platform Based on Memory Computing.**  
26 In: *Seventh International Symposium on Parallel Architectures, Algorithms and Programming:*  
27 *2016.* 172-176.  
28
- 29 8. Zaharia M, Chowdhury M, Das T *et al.* **Resilient distributed datasets: A fault-tolerant**  
30 **abstraction for in-memory cluster computing.** In: *Proceedings of the 9th USENIX conference*  
31 *on Networked Systems Design and Implementation: 2012.* USENIX Association: 2-2.  
32
- 33 9. Smith TF, Waterman MS. **Identification of common molecular subsequences.** *Journal of*  
34 *Molecular Biology* 1981, **147**(1):195-197.  
35
- 36 10. Zhao G, Ling C, Sun D. **SparkSW: Scalable Distributed Computing System for Large-Scale**  
37 **Biological Sequence Alignment.** In: *Ieee/acm International Symposium on Cluster, Cloud and*  
38 *Grid Computing: 2015.* 845-852.  
39
- 40 11. Xu B, Li C, Zhuang H *et al.* **DSA: Scalable Distributed Sequence Alignment System Using**  
41 **SIMD Instructions.** In: *Ieee/acm International Symposium on Cluster, Cloud and Grid*  
42 *Computing: 2017.* 758-761.  
43
- 44 12. Xu B, Li C, Zhuang H *et al.* **Efficient Distributed Smith-Waterman Algorithm Based on**  
45 **Apache Spark.** In: *IEEE International Conference on Cloud Computing: 2017.* 608-615.  
46  
47  
48  
49  
50  
51  
52  
53  
54  
55  
56  
57  
58  
59  
60  
61  
62  
63  
64  
65

13. Li H, Durbin R. **Fast and accurate short read alignment with Burrows–Wheeler transform**: Oxford University Press; 2009.
14. Li H, Durbin R. **Fast and accurate long-read alignment with Burrows–Wheeler transform**. *Bioinformatics* 2010, **26**(5):589-595.
15. Li H. **Aligning sequence reads, clone sequences and assembly contigs with BWA-MEM**. 2013, **1303**.
16. Abuín JM, Pichel JC, Pena TF *et al*. **BigBWA: approaching the Burrows–Wheeler aligner to Big Data technologies**. *Bioinformatics* 2015, **31**(24):4003.
17. Decap D, Reumers J, Herzeel C *et al*. **Halvade: scalable sequence analysis with MapReduce**. *Bioinformatics* 2015, **31**(15):2482-2488.
18. Pireddu L, Leo S, Zanetti G. **SEAL: a distributed short read mapping and duplicate removal tool**. *Bioinformatics* 2011, **27**(15):2159.
19. Al-Ars Z, Mushtaq H. **Scalability Potential of BWA DNA Mapping Algorithm on Apache Spark**. In: *SIMBig: 2015*. 85-88.
20. Abuín JM, Pichel JC, Pena TF *et al*. **SparkBWA: Speeding Up the Alignment of High-Throughput DNA Sequencing Data**. *Plos One* 2016, **11**(5):e0155461.
21. Alars HMA. **Streaming Distributed DNA Sequence Alignment Using Apache Spark**. 2017.
22. Mirarab S, Nguyen N, Warnow T. **PASTA: ultra-large multiple sequence alignment**. In: *International Conference on Research in Computational Molecular Biology: 2014*. Springer: 177-191.
23. Liu K, Warnow TJ, Holder MT *et al*. **SATe-II: very fast and accurate simultaneous estimation of multiple sequence alignments and phylogenetic trees**. *Systematic biology* 2011, **61**(1):90-106.
24. Abuín JM, Pena TF, Pichel JC. **PASTASpark: multiple sequence alignment meets Big Data**. *Bioinformatics* 2017, **33**(18):2948-2950.
25. Miyazawa S. **A reliable sequence alignment method based on probabilities of residue correspondences**. *Protein Engineering* 1995, **8**(10):999.
26. Katoh K, Standley DM. **MAFFT Multiple Sequence Alignment Software Version 7: Improvements in Performance and Usability**. *Molecular Biology & Evolution* 2013, **30**(4):772-780.
27. Do CB, Mahabhashyam MS, Brudno M *et al*. **ProbCons: Probabilistic consistency-based multiple sequence alignment**. *Genome Research* 2005, **15**(2):330.

- 1  
2  
3  
4  
5  
6  
7  
8  
9  
10  
11  
12  
13  
14  
15  
16  
17  
18  
19  
20  
21  
22  
23  
24  
25  
26  
27  
28  
29  
30  
31  
32  
33  
34  
35  
36  
37  
38  
39  
40  
41  
42  
43  
44  
45  
46  
47  
48  
49  
50  
51  
52  
53  
54  
55  
56  
57  
58  
59  
60  
61  
62  
63  
64  
65
28. Tommaso PD, Moretti S, Xenarios I *et al.* **T-Coffee: a web server for the multiple sequence alignment of protein and RNA sequences using structural information and homology extension.** *Nucleic Acids Research* 2011, **39**(Web Server issue):13-17.
  29. Lladós J, Guirado F, Cores F *et al.* **PPCAS: Implementation of a Probabilistic Pairwise Model for Consistency-Based Multiple Alignment in Apache Spark;** 2017.
  30. Altschul S, Gish W, Miller W *et al.* **Basic local alignment search tool.** *J. Mol. Biol.* 1990.
  31. C C, G C, V A *et al.* **BLAST+: architecture and applications.** *Bmc Bioinformatics* 2009, **10**(1):421.
  32. Darling AE, Carey L, Feng WC. **The design, implementation, and evaluation of mpiBLAST.** In.: Los Alamos National Laboratory; 2003.
  33. Vouzis PD, Sahinidis NV. **GPU-BLAST: using graphics processors to accelerate protein sequence alignment.** *Bioinformatics* 2010, **27**(2):182-188.
  34. Matsunaga A, Tsugawa M, Fortes J. **Cloudblast: Combining mapreduce and virtualization on distributed resources for bioinformatics applications.** In: *eScience, 2008 eScience'08 IEEE Fourth International Conference on: 2008.* IEEE: 222-229.
  35. Castro MRD, Tostes CDS, Dávila AMR *et al.* **SparkBLAST: scalable BLAST processing using in-memory operations.** *Bmc Bioinformatics* 2017, **18**(1):318.
  36. Zhou W, Li R, Yuan S *et al.* **MetaSpark: a spark-based distributed processing tool to recruit metagenomic reads to reference genomes.** *Bioinformatics* 2017, **33**(7):1090-1092.
  37. Niu B, Zhu Z, Fu L *et al.* **FR-HIT, a very fast program to recruit metagenomic reads to homologous reference genomes.** *Bioinformatics* 2011, **27**(12):1704-1705.
  38. Boisvert S, Laviolette F, Corbeil J. **Ray: simultaneous assembly of reads from a mix of high-throughput sequencing technologies.** *Journal of Computational Biology A Journal of Computational Molecular Cell Biology* 2010, **17**(11):1519.
  39. Simpson JT, Wong K, Jackman SD *et al.* **ABYSS: a parallel assembler for short read sequence data.** *Genome Research* 2009, **19**(6):1117.
  40. Meng J, Wang B, Wei Y *et al.* **SWAP-Assembler: scalable and efficient genome assembly towards thousands of cores.** *Bmc Bioinformatics* 2014, **15**(S9):S2.
  41. Abu-Doleh A, Çatalyürek ÜV. **Spaler: Spark and GraphX based de novo genome assembler.** In: *IEEE International Conference on Big Data: 2015.* 1013-1018.
  42. Pan X, Fu X-L, Dong G-F *et al.* **DNA sequence splicing algorithm based on Spark.** In: *Industrial Informatics-Computing Technology, Intelligent Technology, Industrial Information Integration (ICIICII), 2016 International Conference on: 2016.* IEEE: 52-56.



- 1  
2  
3  
4  
5  
6  
7  
8  
9  
10  
11  
12  
13  
14  
15  
16  
17  
18  
19  
20  
21  
22  
23  
24  
25  
26  
27  
28  
29  
30  
31  
32  
33  
34  
35  
36  
37  
38  
39  
40  
41  
42  
43  
44  
45  
46  
47  
48  
49  
50  
51  
52  
53  
54  
55  
56  
57  
58  
59  
60  
61  
62  
63  
64  
65
43. Dong G, Fu X, Li H *et al.* **An Accurate Sequence Assembly Algorithm for Livestock, Plants and Microorganism Based on Spark.** *International Journal of Pattern Recognition & Artificial Intelligence* 2017, **31**(8).
  44. Paul AJ, Lawrence D, Ahn TH. **Overlap Graph Reduction for Genome Assembly using Apache Spark.** In: *The ACM International Conference: 2017.* 613-613.
  45. Haider B, Ahn TH, Bushnell B *et al.* **Omega: an Overlap-graph de novo Assembler for Metagenomics.** *Bioinformatics* 2014, **30**(19):2717-2722.
  46. Kelly BJ, Fitch JR, Hu Y *et al.* **Churchill: an ultra-fast, deterministic, highly scalable and balanced parallelization strategy for the discovery of human genetic variation in clinical and population-scale genomics.** *Genome biology* 2015, **16**(1):6.
  47. Mushtaq H, Al-Ars Z. **Cluster-based Apache Spark implementation of the GATK DNA analysis pipeline.** In: *Bioinformatics and Biomedicine (BIBM), 2015 IEEE International Conference on: 2015.* IEEE: 1471-1477.
  48. Deng L, Huang G, Zhuang Y *et al.* **HiGene: A high-performance platform for genomic data analysis.** In: *IEEE International Conference on Bioinformatics and Biomedicine: 2016.* 576-583.
  49. Li X, Tan G, Zhang C *et al.* **Accelerating large-scale genomic analysis with Spark.** In: *Bioinformatics and Biomedicine (BIBM), 2016 IEEE International Conference on: 2016.* IEEE: 747-751.
  50. Massie M, Nothaft F, Hartl C *et al.* **Adam: Genomics formats and processing patterns for cloud scale computing.** *EECS Department, University of California, Berkeley, Tech Rep UCB/EECS-2013-207* 2013.
  51. Wiewiórka MS, Messina A, Pacholewska A *et al.* **SparkSeq: fast, scalable and cloud-ready tool for the interactive genomic data analysis with nucleotide precision.** *Bioinformatics* 2014, **30**(18):2652-2653.
  52. Leung CK-S. **Uncertain frequent pattern mining.** In: *Frequent pattern mining.* Springer; 2014: 339-367.
  53. Das MK, Dai H-K. **A survey of DNA motif finding algorithms.** *BMC bioinformatics* 2007, **8**(7):S21.
  54. Shintani T, Kitsuregawa M. **Mining algorithms for sequential patterns in parallel: Hash based approach.** In: *Pacific-Asia Conference on Knowledge Discovery and Data Mining: 1998.* Springer: 283-294.

- 1  
2  
3  
4  
5  
6  
7  
8  
9  
10  
11  
12  
13  
14  
15  
16  
17  
18  
19  
20  
21  
22  
23  
24  
25  
26  
27  
28  
29  
30  
31  
32  
33  
34  
35  
36  
37  
38  
39  
40  
41  
42  
43  
44  
45  
46  
47  
48  
49  
50  
51  
52  
53  
54  
55  
56  
57  
58  
59  
60  
61  
62  
63  
64  
65
55. Qiao S, Tang C, Dai S *et al.* **Partspan: Parallel sequence mining of trajectory patterns.** In: *Fuzzy Systems and Knowledge Discovery, 2008 FSKD'08 Fifth International Conference on: 2008.* IEEE: 363-367.
  56. Chen C-C, Tseng C-Y, Chen M-S. **Highly scalable sequential pattern mining based on mapreduce model on the cloud.** In: *Big Data (BigData Congress), 2013 IEEE International Congress on: 2013.* IEEE: 310-317.
  57. Jiang F, Leung CK, Sarumi OA *et al.* **Mining sequential patterns from uncertain big DNA in the spark framework.** In: *Bioinformatics and Biomedicine (BIBM), 2016 IEEE International Conference on: 2016.* IEEE: 874-881.
  58. Rao CR. **Large sample tests of statistical hypotheses concerning several parameters with applications to problems of estimation.** In: *Mathematical Proceedings of the Cambridge Philosophical Society: 1948.* Cambridge University Press: 50-57.
  59. Westfall PH, Young SS. **Resampling-based multiple testing: Examples and methods for p-value adjustment,** vol. 279: John Wiley & Sons; 1993.
  60. Bahmani A, Sibley AB, Parsian M *et al.* **SparkScore: leveraging apache spark for distributed genomic inference.** In: *Parallel and Distributed Processing Symposium Workshops, 2016 IEEE International: 2016.* IEEE: 435-442.
  61. Erkek S, Hisano M, Liang C-Y *et al.* **Molecular determinants of nucleosome retention at CpG-rich sequences in mouse spermatozoa.** *Nature structural & molecular biology* 2013, **20(7):**868-875.
  62. Yu N, Li B, Pan Y. **A cloud-assisted application over apache spark for investigating epigenetic markers on DNA genome sequences.** In: *Big Data and Cloud Computing (BDCloud), Social Computing and Networking (SocialCom), Sustainable Computing and Communications (SustainCom)(BDCloud-SocialCom-SustainCom), 2016 IEEE International Conferences on: 2016.* IEEE: 67-74.
  63. Xu X, Ji Z, Zhang Z. **CloudPhylo: a fast and scalable tool for phylogeny reconstruction.** *Bioinformatics* 2016, **33(3):**438-440.
  64. Wale N. **Machine learning in drug discovery and development.** *Drug Development Research* 2011, **72(1):**112-119.
  65. Costello JC, Heiser LM, Georgii E *et al.* **A community effort to assess and improve drug sensitivity prediction algorithms.** *Nature biotechnology* 2014, **32(12):**1202-1212.

- 1  
2  
3  
4  
5  
6  
7  
8  
9  
10  
11  
12  
13  
14  
15  
16  
17  
18  
19  
20  
21  
22  
23  
24  
25  
26  
27  
28  
29  
30  
31  
32  
33  
34  
35  
36  
37  
38  
39  
40  
41  
42  
43  
44  
45  
46  
47  
48  
49  
50  
51  
52  
53  
54  
55  
56  
57  
58  
59  
60  
61  
62  
63  
64  
65
66. Sastry GM, Inakollu VS, Sherman W. **Boosting virtual screening enrichments with data fusion: coalescing hits from two-dimensional fingerprints, shape, and docking.** *Journal of chemical information and modeling* 2013, **53**(7):1531-1542.
  67. Harnie D, Saey M, Vapirev AE *et al.* **Scaling machine learning for target prediction in drug discovery using apache spark.** *Future Generation Computer Systems* 2017, **67**:409-417.
  68. Yang A, Troup M, Lin P *et al.* **Falco: a quick and flexible single-cell RNA-seq processing framework on the cloud.** *Bioinformatics* 2016, **33**(5):767-769.
  69. O'Brien AR, Saunders NFW, Guo Y *et al.* **VariantSpark: population scale clustering of genotype information.** *Bmc Genomics* 2015, **16**(1):1-9.
  70. Alexander DH, Novembre J, Lange K. **Fast model-based estimation of ancestry in unrelated individuals.** *Genome Research* 2009, **19**(9):1655.
  71. Di Z, Zhao L, Li B *et al.* **SEQSpark: A Complete Analysis Tool for Large-Scale Rare Variant Association Studies Using Whole-Genome and Exome Sequence Data.** *American Journal of Human Genetics* 2017, **101**(1):115.
  72. Klein M, Sharma R, Bohrer CH *et al.* **Biospark: scalable analysis of large numerical datasets from biological simulations and experiments using Hadoop and Spark.** *Bioinformatics* 2017, **33**(2):303-305.

## **Table List**

1  
2  
3  
4  
5  
6  
7  
8  
9  
10  
11  
12  
13  
14  
15  
16  
17  
18  
19  
20  
21  
22  
23  
24  
25  
26  
27  
28  
29  
30  
31  
32  
33  
34  
35  
36  
37  
38  
39  
40  
41  
42  
43  
44  
45  
46  
47  
48  
49  
50  
51  
52  
53  
54  
55  
56  
57  
58  
59  
60  
61  
62  
63  
64  
65

**Table 1 Commonly-used transformations and actions on RDDs in Apache Spark**

**Table 2 Apache Spark-based bioinformatics tools and algorithms**

**Table 1 Commonly-used transformations and actions on RDDs in Apache Spark**

|                 |                                                                                                                                                                                                      |
|-----------------|------------------------------------------------------------------------------------------------------------------------------------------------------------------------------------------------------|
| Transformations | map ( <i>f</i> ): Apply the function <i>f</i> to each element of the RDD, and the return value is the new RDD.                                                                                       |
|                 | filter ( <i>f</i> ): Use the function <i>f</i> to filter out elements that do not meet the criteria. The return value is the new RDD.                                                                |
|                 | flatMap ( <i>f</i> ): Apply the function <i>f</i> to each element of the RDD, split the element data into an iterator, and the return value is the new RDD.                                          |
|                 | mapPartitions ( <i>f</i> ): Similar to map, except that the input function of map () is applied to each element in the RDD, and the input function of mapPartitions () is applied to each partition. |
|                 | sample ( <i>withReplacement, fraction, seed</i> ): Return a new RDD that was generated by randomly sampling the original RDD.                                                                        |
|                 | distinct (): Deduplication of elements in RDD.                                                                                                                                                       |
|                 | cartesian ( <i>other RDD</i> ): Find the Cartesian product of two RDDs.                                                                                                                              |
|                 | union ( <i>other RDD</i> ): Return a new RDD that contains all the elements of two RDDs.                                                                                                             |
|                 | intersection ( <i>other RDD</i> ): Return a new RDD that contains the common elements of two RDDs.                                                                                                   |
|                 | subtract ( <i>other RDD</i> ): Remove the same elements from the original RDD and the RDD parameter.                                                                                                 |
| Actions         | collect (): Return all elements of the RDD.                                                                                                                                                          |
|                 | count (): Return the number of elements in the RDD.                                                                                                                                                  |
|                 | countByValue( <i>n</i> ): Return the number of occurrences of each element in the RDD.                                                                                                               |
|                 | take ( <i>n</i> ): Return an array of the first <i>n</i> elements of the RDD.                                                                                                                        |
|                 | first (): Return the first element of the RDD.                                                                                                                                                       |
|                 | reduce ( <i>f</i> ): Use function <i>f</i> to integrate all elements of the RDD, such as sum operations.                                                                                             |
|                 | foreach ( <i>f</i> ): Run function <i>f</i> for each element of RDD.                                                                                                                                 |
|                 | takeOrdered ( <i>n, [ordering]</i> ): Return first <i>n</i> elements from the RDD by default (ascending) or by specifying a collation.                                                               |
|                 | takeSample ( <i>withReplacement, num, [seed]</i> ): Return an array of randomly sampled <i>num</i> elements in the datasets.                                                                         |
|                 | saveAsTextFile ( <i>path</i> ): Save all elements of the RDD as a text file to the local file system.                                                                                                |

**Table 2 Bioinformatics tools and algorithms based on Apache Spark**

| Function                    | Name         | URL                                                                                                     | Reference |
|-----------------------------|--------------|---------------------------------------------------------------------------------------------------------|-----------|
| Sequence                    | SparkSW      | <a href="https://github.com/s0897918/SparkSW/">https://github.com/s0897918/SparkSW/</a>                 | [10]      |
| alignment/mapping           | DSA          | <a href="https://github.com/xubo245/DSA">https://github.com/xubo245/DSA</a>                             | [11]      |
|                             | CloudSW      | <a href="https://github.com/xubo245/CloudSW">https://github.com/xubo245/CloudSW</a>                     | [12]      |
|                             | SparkBWA     | <a href="https://github.com/citiususc/SparkBWA">https://github.com/citiususc/SparkBWA</a>               | [20]      |
|                             | StreamBWA    | <a href="https://github.com/HamidMushtaq/StreamBWA">https://github.com/HamidMushtaq/StreamBWA</a>       | [21]      |
|                             | PASTASpark   | <a href="https://github.com/citiususc/pastaspark">https://github.com/citiususc/pastaspark</a>           | [24]      |
|                             | PPCAS        | <a href="https://github.com/jllados/PPCAS">https://github.com/jllados/PPCAS</a>                         | [29]      |
|                             | SparkBLAST   | <a href="https://github.com/sparkblastproject/v2">https://github.com/sparkblastproject/v2</a>           | [35]      |
| Sequence assembly           | MetaSpark    | <a href="https://github.com/zhouweiyg/metaspark">https://github.com/zhouweiyg/metaspark</a>             | [36]      |
|                             | Spaler       | Not Available                                                                                           | [41]      |
|                             | SA-BR-Spark  | Not Available                                                                                           | [43]      |
| Sequence analysis           | HiGene       | Not Available                                                                                           | [48]      |
|                             | GATK-Spark   | Not Available                                                                                           | [49]      |
|                             | SparkSeq     | <a href="https://bitbucket.org/mwiewiorka/sparkseq/">https://bitbucket.org/mwiewiorka/sparkseq/</a>     | [51]      |
| Genome inference            | SparkScore   | Not Available                                                                                           | [72]      |
| Phylogeny reconstruction    | CloudPhylo   | <a href="https://github.com/XingjianXu/cloudphylo">https://github.com/XingjianXu/cloudphylo</a>         | [63]      |
| Drug discovery              | S-CHEMO      | Not Available                                                                                           | [67]      |
| Single-cell RNA-seq         | Falco        | <a href="https://github.com/VCCRI/Falco/">https://github.com/VCCRI/Falco/</a>                           | [68]      |
| Variant association and     | VariantSpark | <a href="https://github.com/BauerLab/VariantSpark">https://github.com/BauerLab/VariantSpark</a>         | [69]      |
| population genetics studies | SEQSpark     | <a href="https://github.com/statgenetics/seqspark">https://github.com/statgenetics/seqspark</a>         | [71]      |
|                             |              | <a href="https://www.assembla.com/spaces/roberts-lab-">https://www.assembla.com/spaces/roberts-lab-</a> | [72]      |
| Other                       | BioSpark     | <a href="public/wiki/Biospark">public/ wiki/Biospark</a>                                                |           |

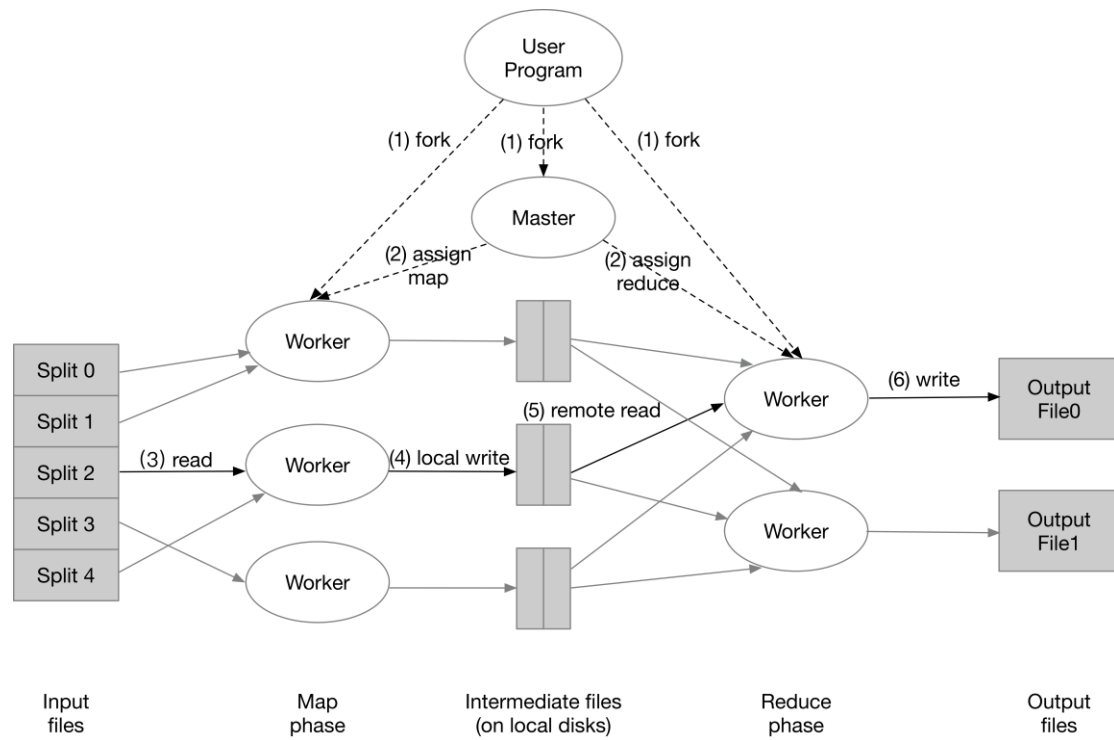

**Figure 1 The operating mechanism diagram of Hadoop**

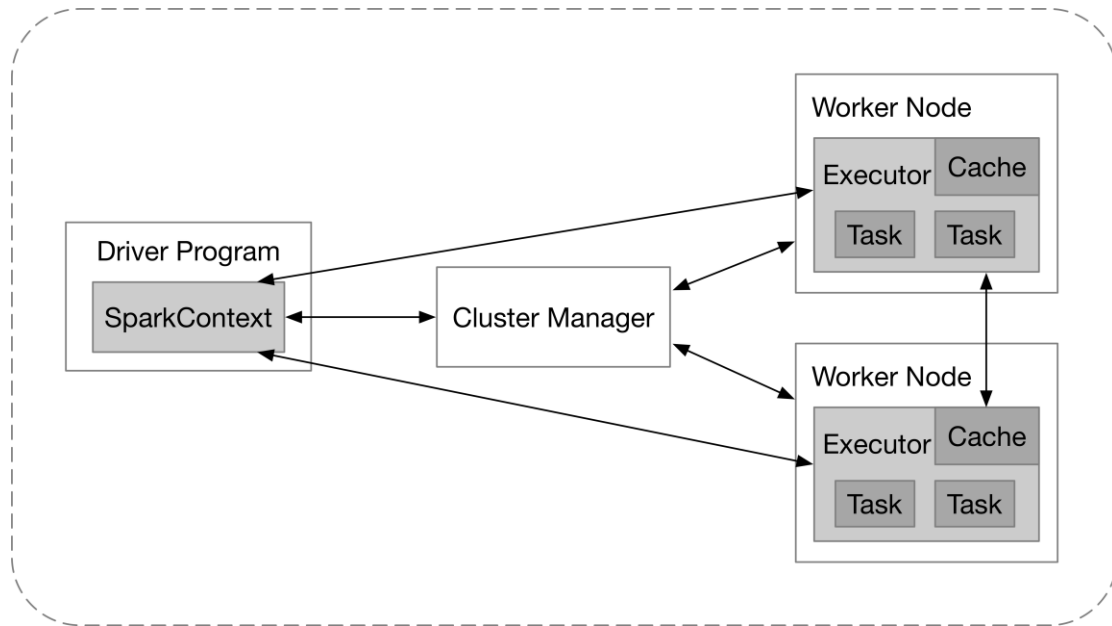

**Figure 2 The architecture of Spark**



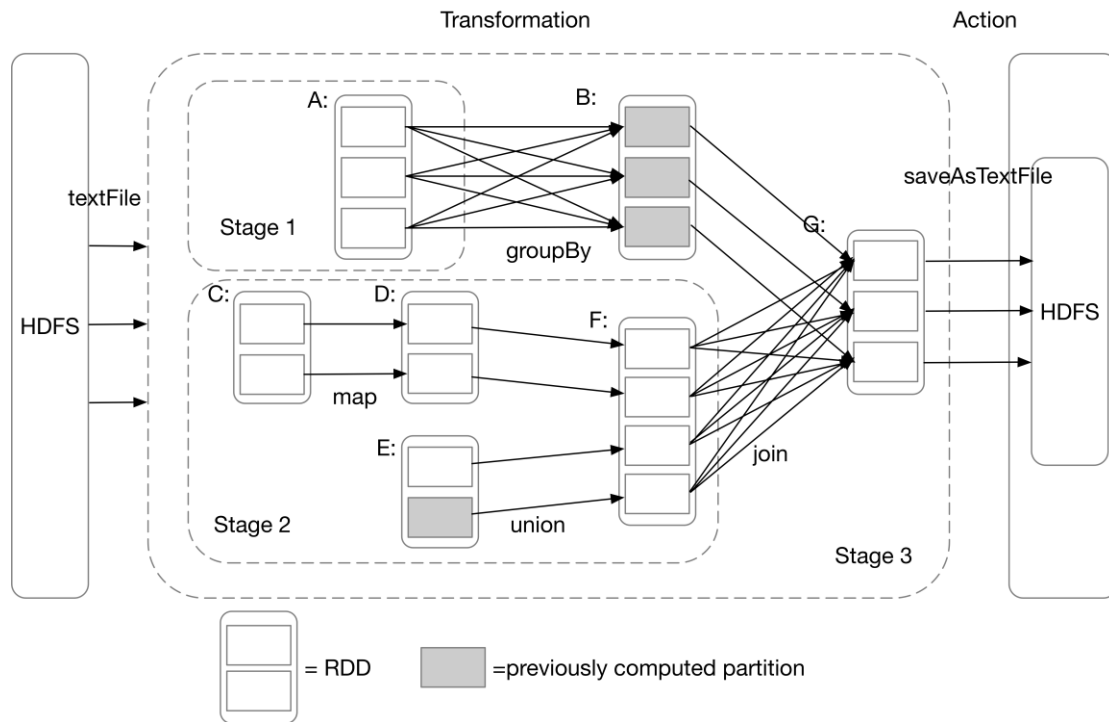

**Figure 3 The task processing flow chart of Spark**

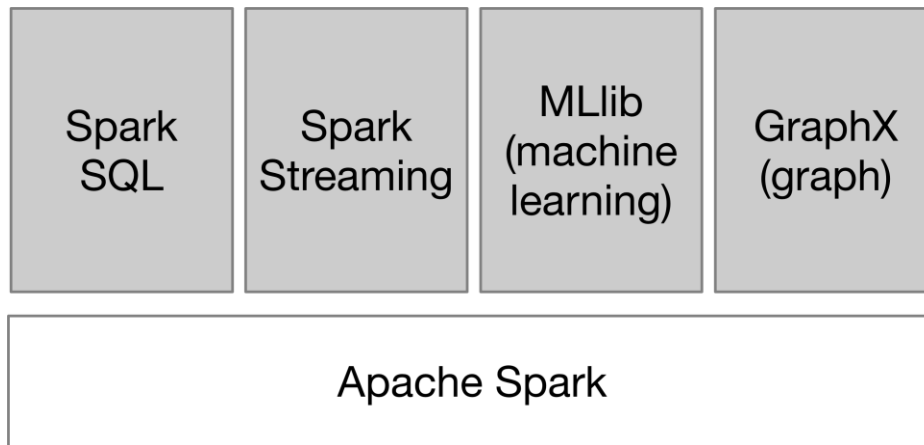

**Figure 4 The Spark ecosystem**



Click here to access/download  
**Supplementary Material**  
Cover Letter.docx





Click here to access/download  
**Supplementary Material**  
Home.md



Supplement: giy098_giga-d-18-00131_original_submission.pdf [file giy098_giga-d-18-00131_original_submission.pdf]
